# Supplementary material
Source: PubMed Central journal article supplement (PMC3670365)
Supplement: 1218145110_pnas.201218145SI.pdf [file 1218145110_pnas.201218145SI.pdf]

# Supporting Information

Zhou et al. 10.1073/pnas.1218145110

## SI Materials and Methods

**Immunohistochemistry and Microscopy.** For BrdU labeling, pups were injected i.p. with BrdU at the dosage of 0.1 mg/g body weight 2 h before the eyes were enucleated. A drop of tissue-marking dye (Triangle Biomedical Sciences) or Histogel (Thermo Scientific) was dripped onto the dorsal side of the eyes upon enucleating. Eyes were fixed in 4% formaldehyde at 4 °C overnight and then processed through standard tissue processing techniques. For detecting the phosphorylated form of SMAD proteins 1, 5, and 8 (Smad1/5/8), a phosphatase inhibitor mixture (Calbiochem) was added during tissue fixation. The sectioned eye tissues on the slides were treated with heat in 1× citrate buffer for antigen retrieval, blocked with Powerblock (Biogenex), and incubated with primary antibodies overnight at 4 °C. Primary antibodies used in this study include: pSMAD1/5/8 (Cell Signaling, #9511); Notch2 (Developmental Studies Hybridoma Bank or DSHB, C651.6DbHN); Jagged (Jag)1 (Santa Cruz Biotechnology, H-66); BrdU (Megabase Research Products, #BP40250); GFP (Invitrogen, A10262); Connexin43 (Cell Signaling, #3512); orthodenticle homeobox 1 (Otx1) (DSHB, Otx-5F5); paired box 6 (Pax6) (Zymed, #426600); and Collagen IX (DSHB, D1-9). All secondary antibodies conjugated with fluorescent chromes (Alexa 488 and Alexa 568) were purchased from Invitrogen. After immunostaining, tissue sections were counterstained with DAPI (Invitrogen) and mounted with Vectashield Mounting Media (Vector Laboratories). Apoptosis was detected using the Apop-Tag Fluorescein In-Situ Apoptosis Detection Kit (Chemicon). For histological analysis of *Jag1* mutant mice, eyes were fixed by immersion in 2.5% glutaraldehyde and 2% paraformaldehyde at 4 °C for 24 h and processed as previously described (1). Only

sections going through the middle of the eye and containing optic nerve were examined.

**Western Blotting.** The outer ciliary epithelium (OCE) layer of the control and *Notch2* *CKO* mutant P3 ciliary bodies (CBs) was dissected, and then ground in SDS sample buffer. The protein lysates were subjected to SDS/PAGE electrophoresis. The primary antibodies used for Western blotting were: bone morphogenetic protein (BMP) receptors Bmpr1a, Bmpr1b, Bmpr2, Smad1, Smad5, Smad8 (Santa Cruz); pSMAD1/5/8 (Cell Signaling); and  $\beta$ -actin (Abcam). The secondary HRP-conjugated antibodies were purchased from Promega, and Western Lightning Plus-ECL reagent (PerkinElmer) was used for signal development.

**Lentivirus Production, Intraocular Injection, and Cell Culture.** cDNAs for full-length coding sequence of (Chordin-like 1) *Chrdl1* and (Neuroblastoma 1) *Nbl1* were cloned by PCR and cloned into the vector pIRES2-enhanced green fluorescent protein (EGFP) (Addgene). Coding sequences of *Chrdl1* and *Nbl1* together with IRES-EGFP was subcloned into the pSicoR lentivirus vector (Addgene). High-titer lentiviruses were produced by cotransfecting the construct and packaging plasmids psPAX2 and pMD2.G (Addgene) into 293T cells and were then injected into the CB region of around birth (P0) CD1 pups. Eyeballs were collected at P3 for further analysis. For the in vitro assays, after lentiviruses had been added to cultured 293T cells for 4 h, culture medium was replaced by fresh medium supplemented with either DMEM only or DMEM containing 2 ng/mL, 5 ng/mL, and 10 ng/mL recombinant human BMP4 (PeproTech). Cells were harvested 12 h later for Western blotting analysis.

1. Harder JM, Libby RT (2011) BBC3 (PUMA) regulates developmental apoptosis but not axonal injury induced death in the retina. *Mol Neurodegener* 6:50.

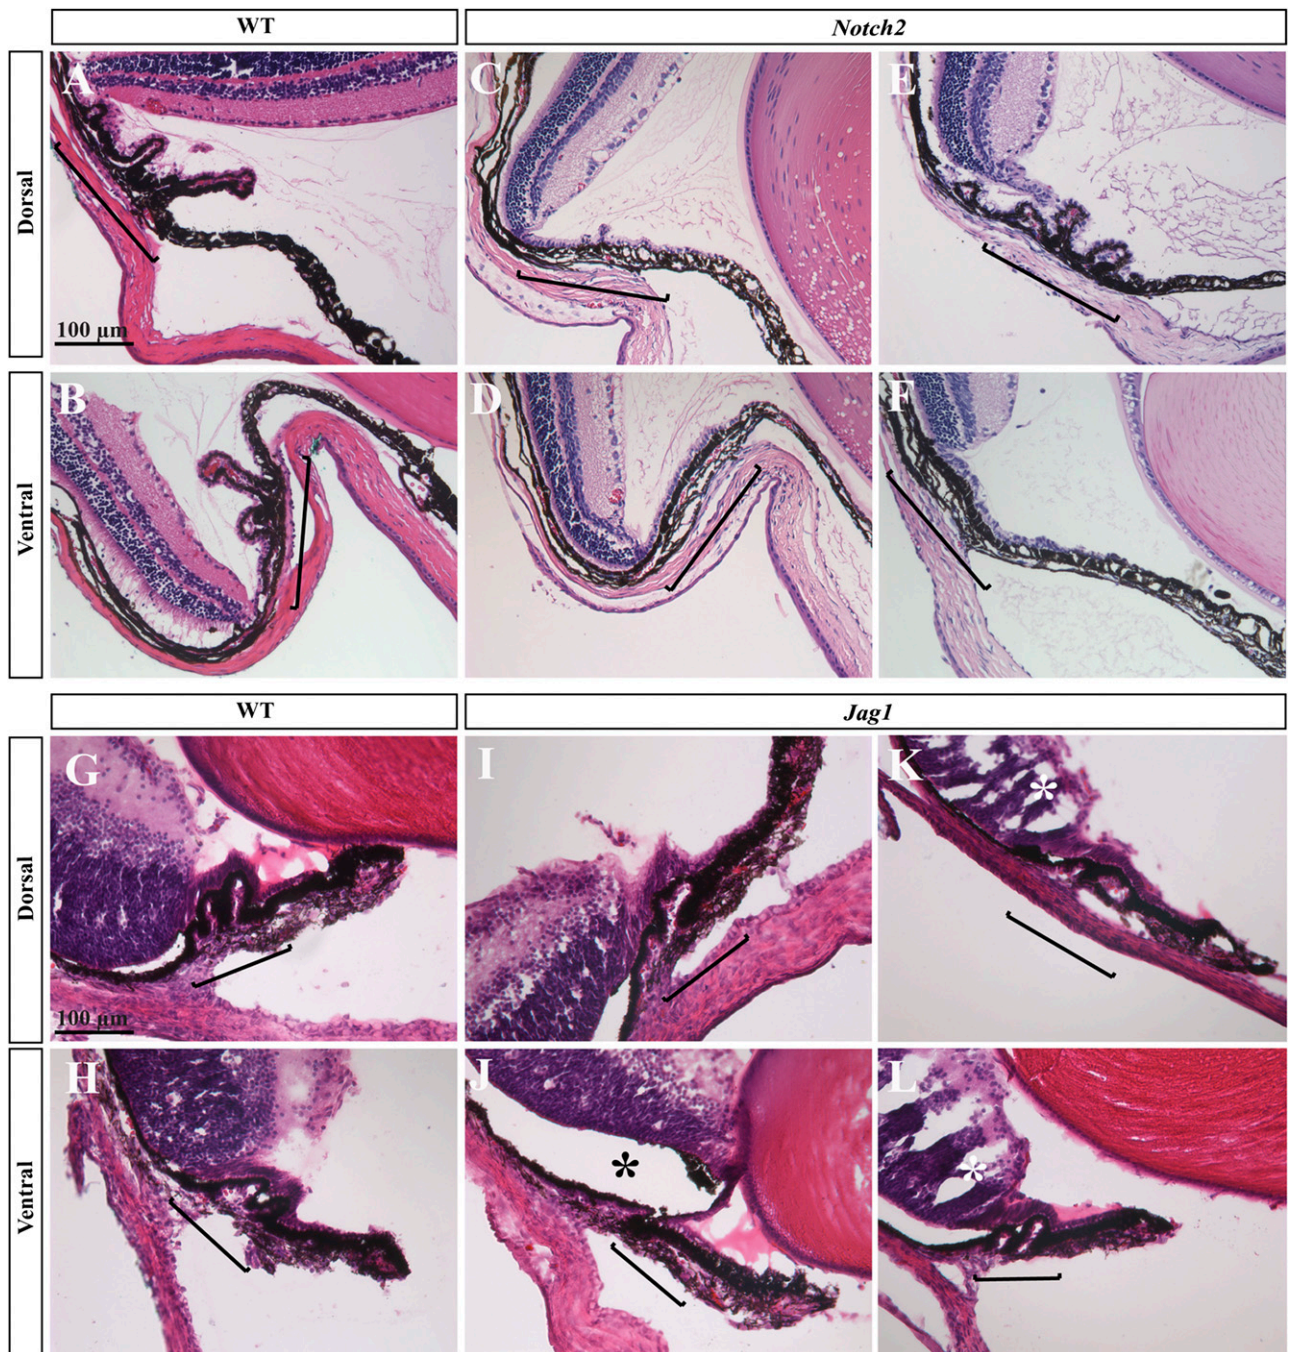

**Fig. S1.** The morphogenesis defect persists in the adult *Notch2* conditional knockout (CKO) mutant CB. (A–F) H&E staining of paraffin sections, whereas G–L represent H&E staining on cryosections. The bracket in A–L indicates the CB region. (A and B) The control CB on the dorsal and ventral of the adult control eye. (C–F) The morphogenesis is completely disrupted on the ventral side (D and F), but more variable on the dorsal side (C and E) of the adult *Notch2* CKO eye. (G and H) The control CB on the dorsal and ventral of the P3 control eye. (I–L) The CB morphogenesis is completely or partly disrupted on both dorsal (I and K) and ventral sides (J and L) of the P3 *Jag1* CKO eye. \*Artifact caused by cryosectioning. (Scale bar: 100 μm.)

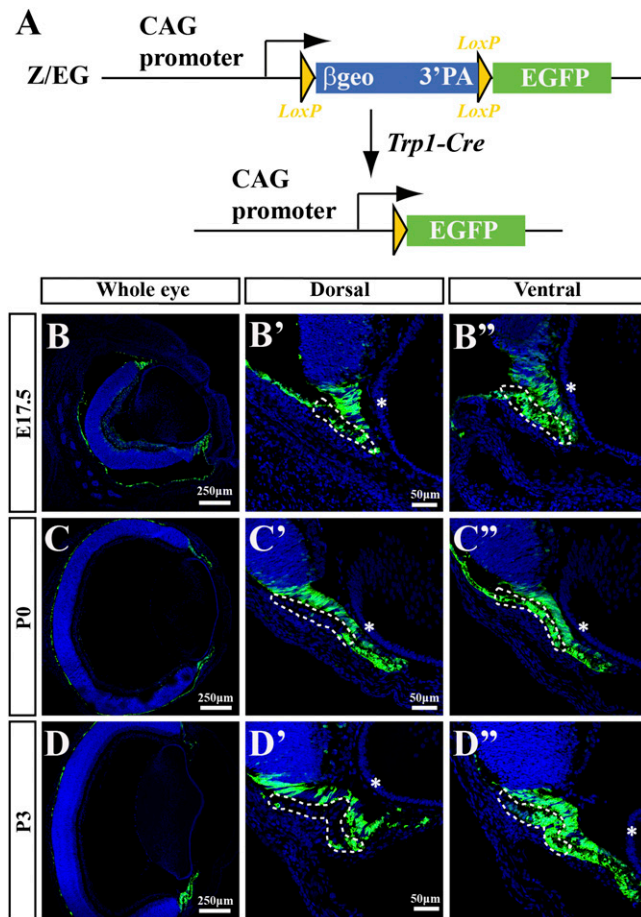

**Fig. S2.** Tyrosinase related protein 1 (*Trp1*)-*Cre* efficiently catalyzes *LoxP*-mediated recombination in the OCE of the ventral but not dorsal CB. (A) *Trp1-Cre* removes the *LoxP*-flanked the  $\beta$ -galactosidase and neomycin fusion gene ( $\beta$ neo) in *Z/EG* to activate GFP expression. (B–D) The CBs on the dorsal side of E17.5 (B), P0 (C), and P3 (D) *Trp1-Cre*; *Z/EG* eyes show highly mosaic GFP expression in the OCE (broken lines) on the dorsal side (B', C', and D') and uniform GFP expression in the OCE (broken lines) on the ventral side (B'', C'', and D''). (Scale bars: B–D, 250  $\mu$ m; B', B'', C', C'', D', D'', 50  $\mu$ m.)









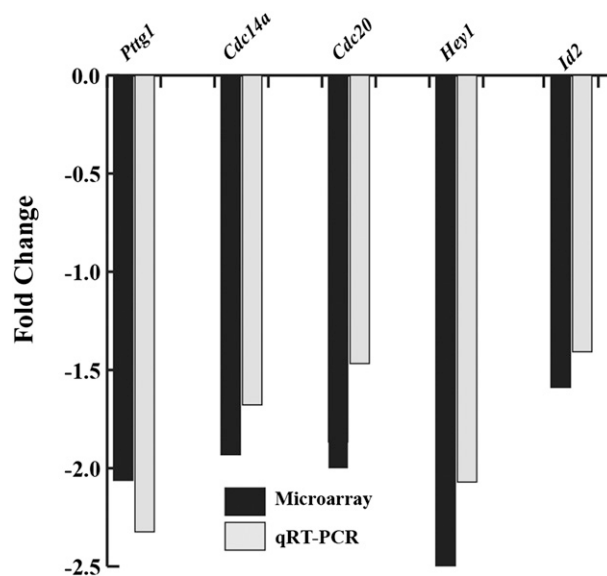

**Fig. S7.** The Notch target gene hairy/enhancer-of-split related with YRPW motif 1 (*Hey1*) and cell-cycle regulators are down-regulated in the *Notch2* CKO mutant CB. Quantitative (q)RT-PCR results confirm the microarray finding that pituitary tumor-transforming gene 1 (*Pttg1*), cell division cycle (*Cdc14a*, *Cdc20*, *Hey1*, and inhibitor of DNA binding 2 (*Id2*) are down-regulated in the *Notch2* CKO mutant CB.

**Table S1.** Expression of many cell-cycle regulators is down-regulated in the *Notch2* CKO mutant CB

| Gene symbol   | Gene name                                            | Fold change* | P value | Note                                                            |
|---------------|------------------------------------------------------|--------------|---------|-----------------------------------------------------------------|
| <i>Hey1</i>   | Hairy/enhancer-of-split related with YRPW motif-like | -2.5         | 0.004   | Known Notch target gene<br>Regulation of cell-cycle progression |
| <i>Cdkn3</i>  | Cyclin-dependent kinase inhibitor 3                  | -2.1         | 0.04    | Negative                                                        |
| <i>Cdc20</i>  | Cell division cycle 20 homolog                       | -2.0         | 0.006   | Positive                                                        |
| <i>Cks2</i>   | CDC28 protein kinase regulatory subunit 2            | -2.1         | 0.03    | Positive                                                        |
| <i>Cdc25c</i> | Cell division cycle 25 homolog C                     | -2.1         | 0.01    | Positive                                                        |
| <i>Cdca3</i>  | Cell division cycle associated 3                     | -2.1         | 0.007   | Positive                                                        |
| <i>Cdca2</i>  | Cell division cycle associated 2                     | -2.1         | 0.006   | Positive                                                        |
| <i>Ttk</i>    | Ttk protein kinase                                   | -2.2         | 0.01    | positive                                                        |
| <i>Ccna2</i>  | Cyclin A2                                            | -2.2         | 0.02    | Positive                                                        |
| <i>Ccnb1</i>  | Cyclin B1                                            | -2.2         | 0.01    | Positive                                                        |
| <i>Pttg1</i>  | Pituitary tumor-transforming gene 1                  | -2.3         | 0.02    | positive                                                        |
| <i>Cdca8</i>  | Cell division cycle-associated 8                     | -2.4         | 0.02    | Positive                                                        |
| <i>Plk1</i>   | Polo-like kinase 1                                   | -2.5         | 0.01    | Positive                                                        |
| <i>Cdca5</i>  | Cell division cycle-associated 5                     | -2.5         | 0.009   | Positive                                                        |

\*A negative number means down-regulation in gene expression.
